# Supplementary material for: Early Detection of Apathetic Phenotypes in Huntington’s Disease Knock-in Mice Using Open Source Tools
Source: PubMed Central journal article supplement (PMC5797185; doi:10.1038/s41598-018-20607-7), 2018-02-02
Supplement: 41598_2018_20607_MOESM1_ESM.pdf [file 41598_2018_20607_MOESM1_ESM.pdf]

# Supplemental Material

## Early Detection of Apathetic Phenotypes in Huntington's Disease Knock-in Mice Using Open Source Tools

Shawn Minnig <sup>1,\*\*</sup>, Robert M. Bragg <sup>1,\*\*</sup>, Hardeep S. Tiwana <sup>1</sup>, Wes T. Solem <sup>1</sup>, William S. Hovander <sup>1</sup>, Eva-Mari S. Vik <sup>1</sup>, Madeline Hamilton <sup>1</sup>, Samuel R.W. Legg, Dominic D. Shuttleworth, Sydney R. Coffey <sup>1</sup>, Jeffrey P. Cattle <sup>1</sup>, Jeffrey B. Carroll <sup>1,\*</sup>

<sup>1</sup> Behavioral Neuroscience Program, Department of Psychology, Western Washington University, Bellingham WA 98225

\*\* Equal Contribution

\* Corresponding author:

### **Affiliations:**

Behavioral Neuroscience Program, Department of Psychology, Western Washington University, Bellingham WA 98225

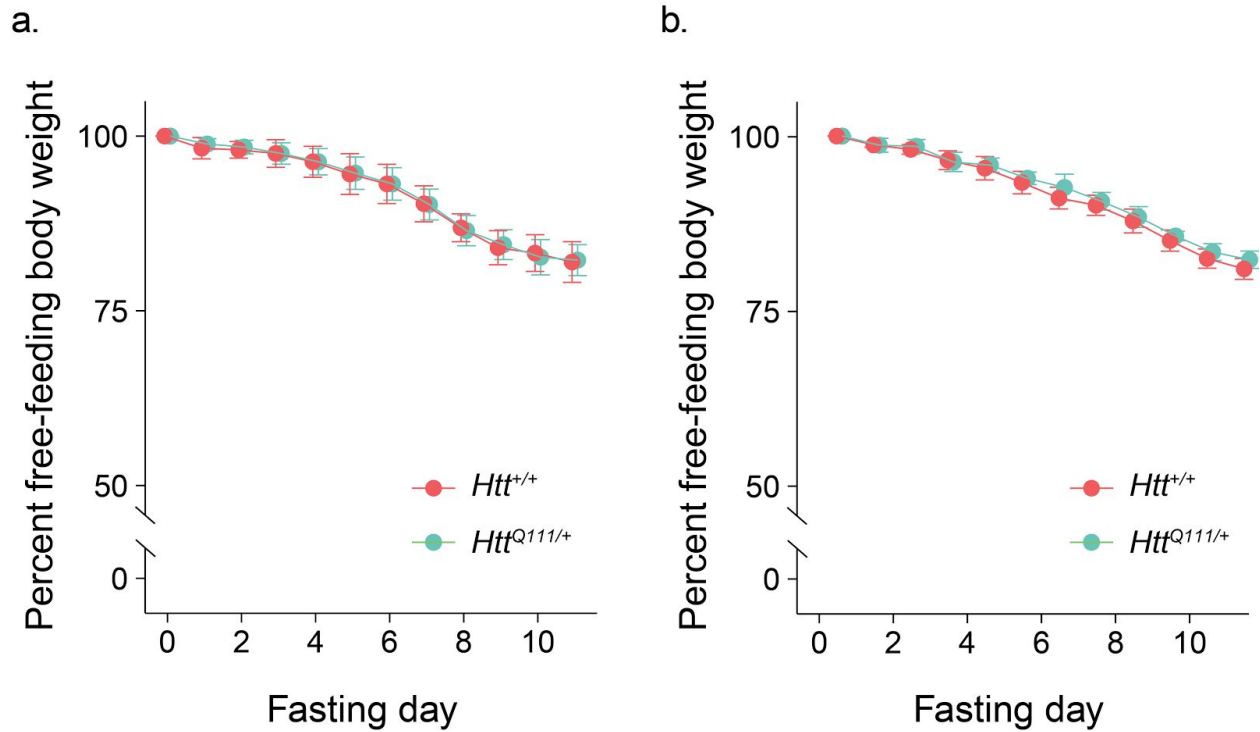

**Supplemental Fig 1: Body weight during food restriction of 10-month-old  $Htt^{+/+}$  and  $Htt^{Q111/+}$  mice.** Body weight was reduced during 11 days of food restriction, but genotype did not change overall body weight, or the rate at which mice lost weight . **a.** Initial cohort: linear mixed effects model, effect of date  $F_{(11, 187)} = 673.6, p < 0.0001$ ; effect of genotype  $F_{(1, 17)} < 0.001, p = 0.96$ ; genotype x date interaction  $F_{(11, 187)} = 0.5, p = 0.87$ . **b.** Replication cohort: linear mixed effects model, effect of date  $F_{(11, 242)} = 889.9, p < 0.0001$ , effect of genotype  $F_{(1, 22)} = 2.6, p = 0.12$ , effect of genotype x date interaction  $F_{(11, 242)} = 1.33, p = 0.21$ . Error bars represent S.E.M.
